# Supplementary material
Source: ML conference proceedings conference paper supplement (https://openaccess.thecvf.com/content/CVPR2023/html/Yang_Learning_Event_Guided_CVPR_2023_paper.html)
Supplement: Supplementary file 2 [file Yang_Learning_Event_Guided_CVPR_2023_supplemental.zip]

Archive with 2 entries (2 files):
- CVPR23_HDRev_supplementary.pdf
- supplementary_videos.mp4
